# Supplementary material for: A naphthoimidazolium-cholesterol derivative as a ratiometric fluorescence based chemosensor for the chiral recognition of carboxylates
Source: Royal Society of Chemistry journal article supplement (doi:10.1039/c8cc06262e), 2018-01-01
Supplement: c8cc06262e3.pdf [file c8cc06262e3.pdf]

**Supporting Information for “Naphthoimidazolium-cholesterol  
derivative as a ratiometric fluorescence based chemosensor for the  
chiral recognition of carboxylates”**

Xin Zhang,<sup>a†</sup> Gyeongju Ko,<sup>b†</sup> Joonyoung F. Joung,<sup>c†</sup> Meng Li,<sup>d</sup> Yerin Jeong,<sup>b</sup> K.M.K. Swamy,<sup>b</sup> Dayoung Lee,<sup>b</sup> Yifan Liu,<sup>b</sup> Songyi Lee,<sup>\*e</sup> Sungnam Park,<sup>\*c</sup> Tony D. James<sup>\*d</sup> and Juyoung Yoon<sup>\*b</sup>

<sup>a</sup>National Demonstration Center for Experimental Chemistry Education, College of Chemistry and Materials Science, Hebei Normal University, Shijiazhuang, 050024, China

<sup>b</sup>Department of Chemistry and Nano Science, Ewha Womans University, Seoul, 03760, Korea

<sup>c</sup>Department of Chemistry, Korea University, Seoul, 02841, Korea.

<sup>d</sup>Department of Chemistry, University of Bath, Bath, BA2 7AY, United Kingdom

<sup>e</sup>Department of Chemistry, Pukyong National University, Busan, 48513, Korea

*jyoon@ewha.ac.kr; t.d.james@bath.ac.uk; spark8@korea.ac.kr; slee@pknu.ac.kr*

## Experimental

Unless otherwise noted, materials were obtained from commercial suppliers, and were used without further purification. Thin layer chromatography (TLC) was carried out using Merck 60 F<sub>254</sub> plates of 0.25 mm thickness. Preparative TLC was performed using Merck 60 F<sub>254</sub> plates of 1 mm thickness. <sup>1</sup>H NMR and <sup>13</sup>C NMR spectra were recorded using Bruker (300 and 75) MHz. Chemical shifts are expressed in ppm and coupling constants (*J*) in Hz. Melting points were measured using a Büchi 530 melting point apparatus. Fluorescence emission spectra were obtained by FS-2 fluorescence spectrometry (Scinco) at room temperature.

**Synthesis of compound 3:** 4.0 g of cholesteryl chloroformate (8.9 mmol) and 2-iodoethanol (1.58 g, 9.2 mmol) were dissolved in 30 ml of anhydrous dichloromethane. 1.42 ml of pyridine was then added at 0 °C. The mixture was stirred at room temperature for 12 h. The solvent was removed under reduced pressure and the residue was purified by column chromatography (silica gel, hexane/dichloromethane = 1:1, v/v). 4.2 g of white solid was obtained, yield: 80.8 %. M.p. = 105.3-107.1 °C. <sup>1</sup>H NMR (300 MHz, CDCl<sub>3</sub>) δ 5.42 (s, 1H, He), 4.45-4.56 (m, 1H, Hc), 4.38 (t, 2H, *J* = 6.9 Hz, Hb), 3.33 (t, 2H, *J* = 6.9 Hz, Ha), 2.41 (d, 2H, *J* = 6.6 Hz, Hd), 1.88-2.05 (m, 5H, Cholesteryl Hs), 0.87-1.70 (m, 33H, Cholesteryl Hs), 0.69 (s, 3H, Cholesteryl-CH<sub>3</sub>). <sup>13</sup>C NMR (75 MHz, CDCl<sub>3</sub>) δ 139.6, 123.5, 78.8, 67.9, 57.1, 56.5, 50.4, 42.7, 40.1, 39.9, 38.4, 37.2, 36.9, 36.6, 36.2, 32.2, 28.6, 28.4, 28.1, 24.7, 24.2, 23.3, 23.0, 21.5, 19.7, 19.1, 12.3. FAB-HRMS C<sub>30</sub>H<sub>49</sub>IO<sub>3</sub> ([M+Na]<sup>+</sup>) calcd 607.2624, found 607.2624.

**Synthesis of compound 4:** 61 mg of **2** (0.33 mmol) and 193 mg of **3** (0.33 mmol) were added into 5 ml of acetonitrile. The mixture stirred at reflux under nitrogen atmosphere for 24 h. After cooling to room temperature, the solvent was evaporated under reduced pressure. The residue was washed with methanol and dried to give 205 mg of **4** as a white solid, yield: 81.1 %. M.p. = 215.9-217.4 °C. <sup>1</sup>H NMR (300 MHz, CDCl<sub>3</sub>) δ 11.35 (s, 1H, Ha), 8.26 (s, 1H, Hb), 8.16 (s, 1H, Hc), 8.09-8.14 (m, 2H, Hd and Hg), 7.66-7.72 (m, 2H, He and Hg), 5.26 (s, 1H, Hl), 5.13 (t, 2H, *J* = 5.4 Hz, Hi), 4.80 (t, 2H, *J* = 5.4 Hz, Hj), 4.34 (s, 3H, Hh), 4.19-4.30 (m, 1H, Hk), 0.87-2.15 (m, 40H, Cholesteryl Hs), 0.67 (s, 3H, Cholesteryl-CH<sub>3</sub>). <sup>13</sup>C NMR (75 MHz, CDCl<sub>3</sub>) δ 153.8, 146.2, 138.9, 133.8, 131.9, 131.7, 130.7, 128.4, 128.3, 127.5, 123.1, 110.9, 110.3, 100.0, 78.8, 56.6, 56.1, 49.9, 42.3, 39.5, 36.4, 31.8, 28.0, 23.8, 22.8, 22.6, 19.2, 18.7, 11.8. FAB-HRMS C<sub>42</sub>H<sub>59</sub>IN<sub>2</sub>O<sub>3</sub> ([M+Na]<sup>+</sup>) calcd 789.3468, found 789.3469.

**Synthesis of compound 1 (NI-chol 1):** 470 mg of compound **4** was dissolved in 8 ml of DMF, then aqueous saturated KFP<sub>6</sub> was added dropwise to give a white precipitate. The residue was filtered under reduced pressure and washed with water several times and dried in a vacuum oven at 40 °C for 24 h. 480 mg of **1** as a white solid was obtained, yield: 98.6 %. M.p. = 235.7-237.4 °C. <sup>1</sup>H NMR (300 MHz, CD<sub>3</sub>CN) δ 9.18 (s, 1H, Ha), 8.43 (s, 1H, Hb), 8.40 (s, 1H, Hc), 8.14-8.21 (m, 2H, Hd and Hf), 7.67-7.72 (m, 2H, He and Hg), 5.27 (d, 1H, *J* = 4.5 Hz, Hm), 4.84 (t, 2H, *J* = 5.1 Hz, Hi), 4.64 (t, 2H, *J* = 5.1 Hz, Hj), 4.16 (s, 3H, Hh), 4.14-4.24 (m, 1H, Hk), 2.91 and 2.79 (dd, 1H, *J* = 0.3 Hz and 0.6 Hz, Hl), 2.11-2.15 (m, 2H, Cholesteryl Hs) 2.02-2.04 (m, 1H, Hl), 1.76-1.93 (m, 3H, Cholesteryl Hs), 1.37-1.60 (m, 11H, Cholesteryl Hs), 1.01-1.20 (m, 8H, Cholesteryl Hs), 0.87-0.97 (m, 14H, Cholesteryl Hs), 0.69 (s, 3H, Cholesteryl-CH<sub>3</sub>). <sup>13</sup>C NMR (75 MHz, (CD<sub>3</sub>)<sub>2</sub>SO) δ 153.8, 147.6, 139.4, 131.4, 128.7, 127.1, 122.8, 111.5, 78.0, 65.5, 56.5, 56.0, 49.7, 46.4, 42.3, 36.6, 36.4, 36.2, 36.1, 35.7, 33.9, 31.7, 27.9, 27.4, 24.3, 23.7, 23.1, 22.8, 21.0, 19.2, 19.0, 21.1. FAB-HRMS C<sub>42</sub>H<sub>59</sub>F<sub>6</sub>N<sub>2</sub>O<sub>3</sub>P ([M-PF<sub>6</sub>]<sup>+</sup>) calcd 639.4526, found 639.4256.

**Quantum chemical calculations** The optimized structures were obtained using the DFT method ( $\omega$ B97XD/6-31+G(d) or APFD/6-31+G(d)) as implemented in the Gaussian 16 package. The absorption spectra of optimized structures were calculated using TD-DFT method. The vibronic emission spectra of protonated and deprotonated **NI** were calculated with the bandwidth of 1200 cm<sup>-1</sup> for individual vibronic peaks.

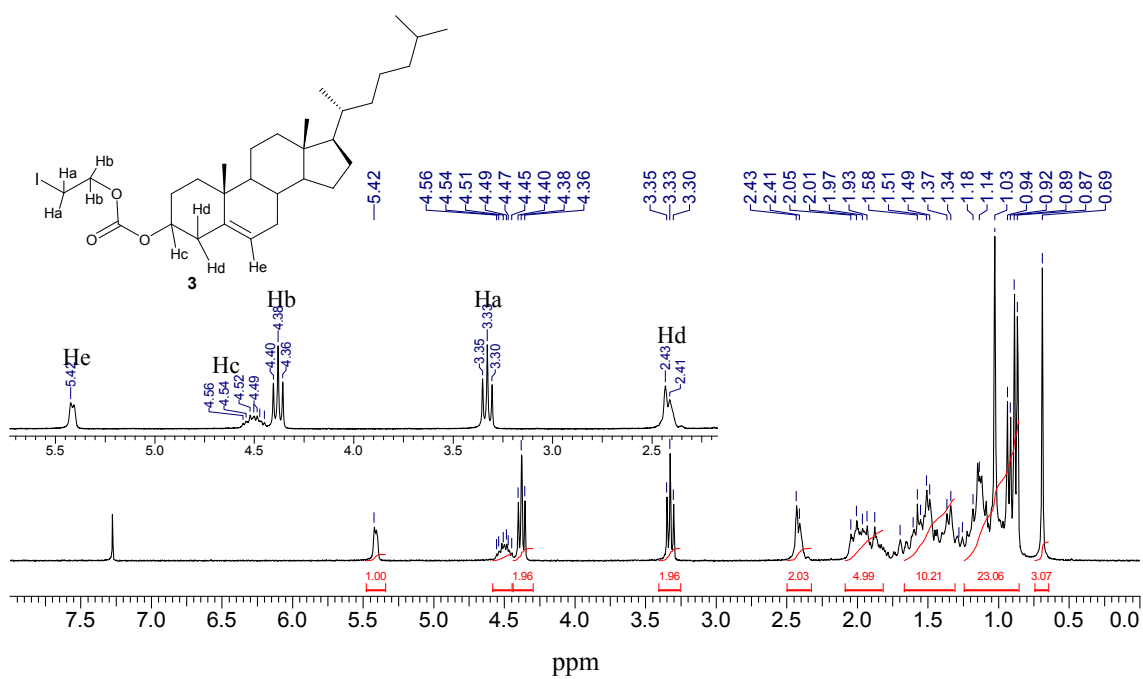

**Figure S1**  $^1\text{H}$  NMR of **3** (CDCl<sub>3</sub>, 300 MHz).

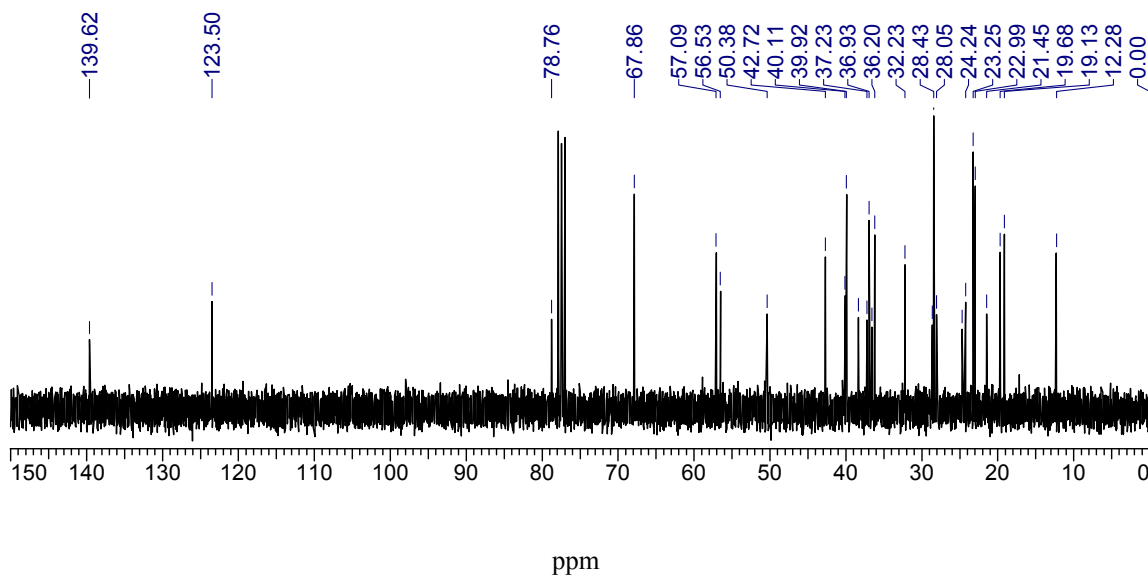

**Figure S2**  $^{13}\text{C}$  NMR of **3** (CDCl<sub>3</sub>, 75 MHz).

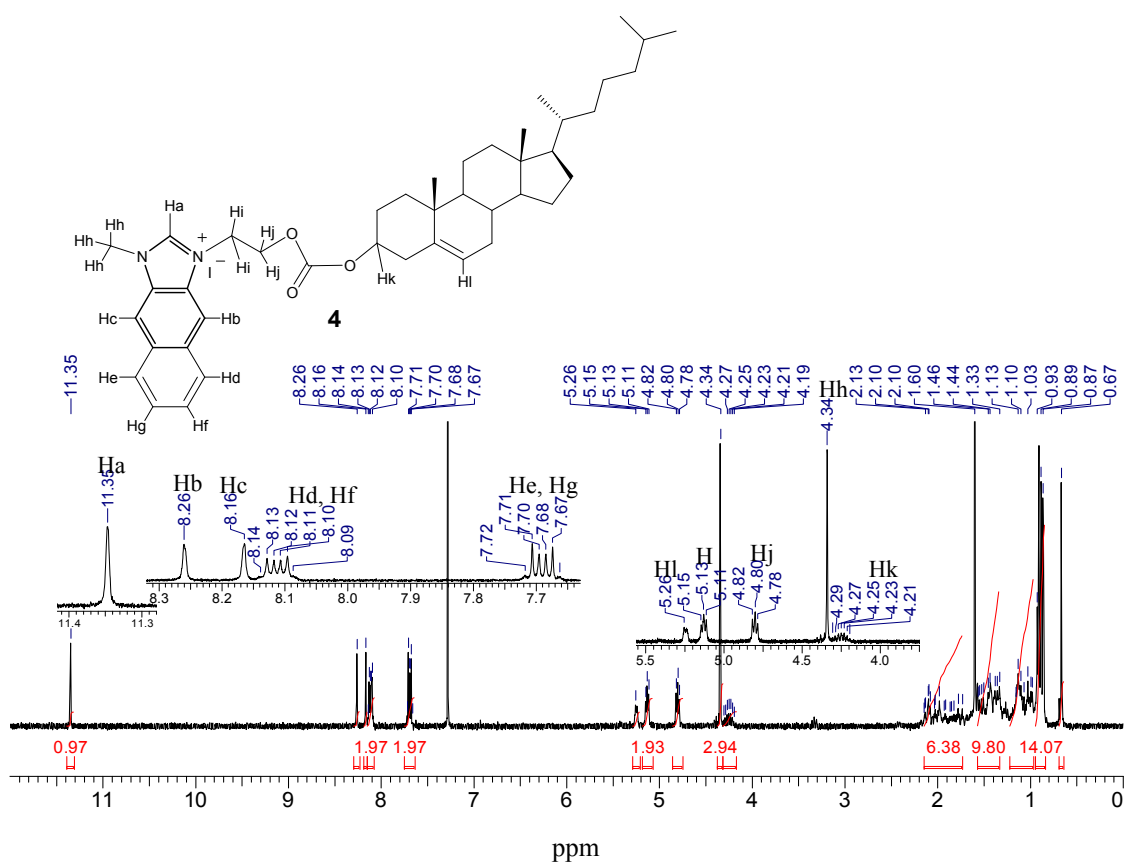

**Figure S3**  $^1\text{H}$  NMR of **4** ( $\text{CDCl}_3$ , 300 MHz).

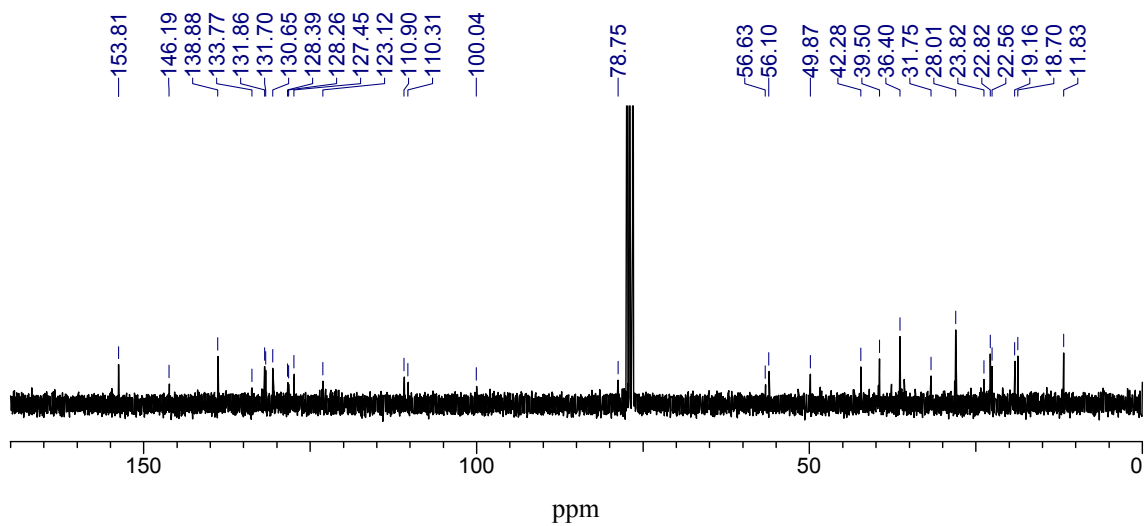

**Figure S4**  $^{13}\text{C}$  NMR of **4** ( $\text{CDCl}_3$ , 75 MHz).

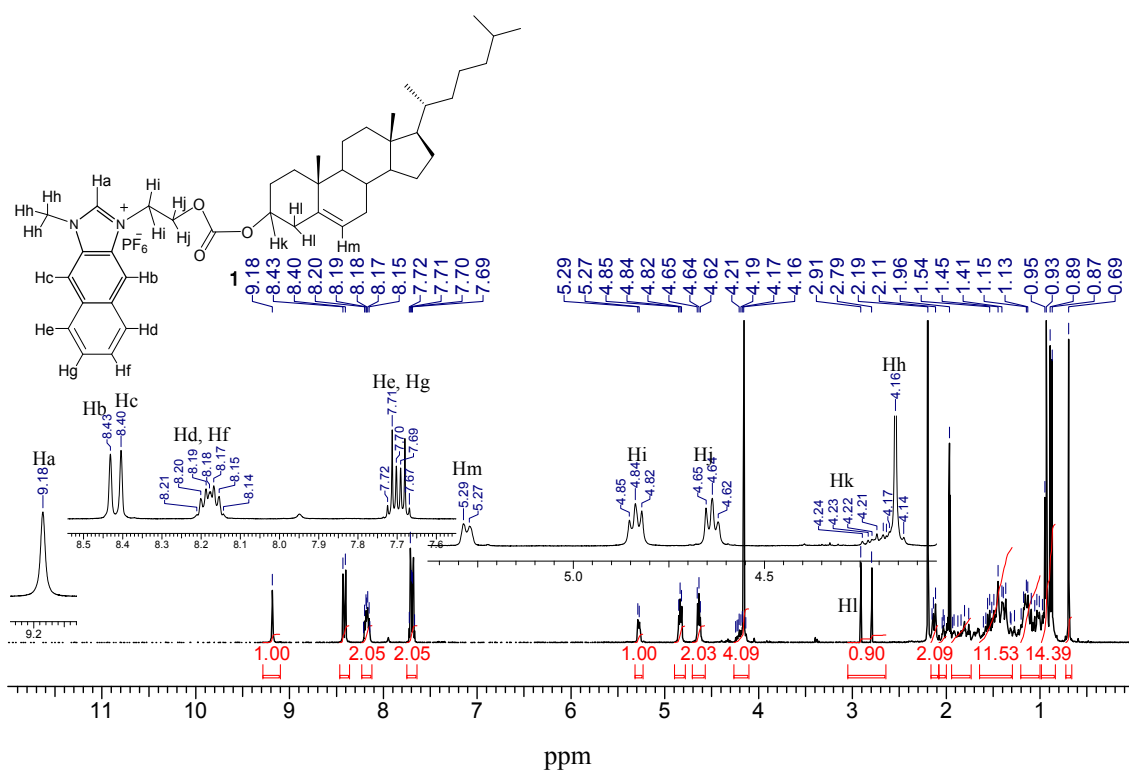

Figure S5 <sup>1</sup>H NMR of **1** (CD<sub>3</sub>CN, 300 MHz).

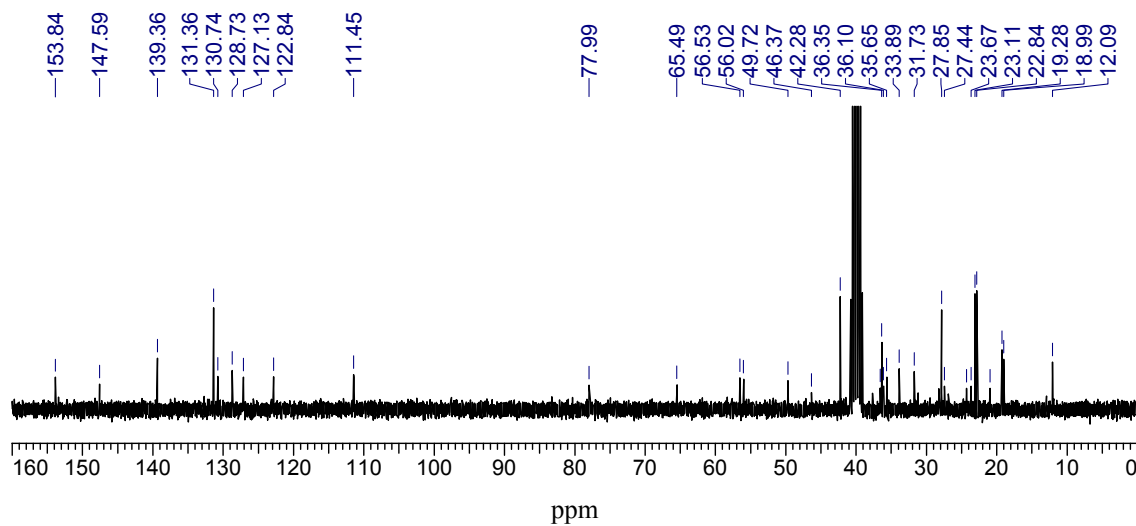

Figure S6 <sup>13</sup>C NMR of **1** (CDCl<sub>3</sub>, 75 MHz).

[ Mass Spectrum ]  
 Data : HFAB-POS-140211008 Date : 11-Feb-2014 18:03  
 Sample: 4  
 Note : with NBA + Na  
 Inlet : Direct Ion Mode : FAB+  
 Spectrum Type : Normal Ion (MF-Linear)  
 RT : 2.09 min Scan# : 26  
 BP : m/z 607.2624 Int. : 18.27  
 Output m/z range : 606.9933 to 607.5309 Cut Level : 0.00 %

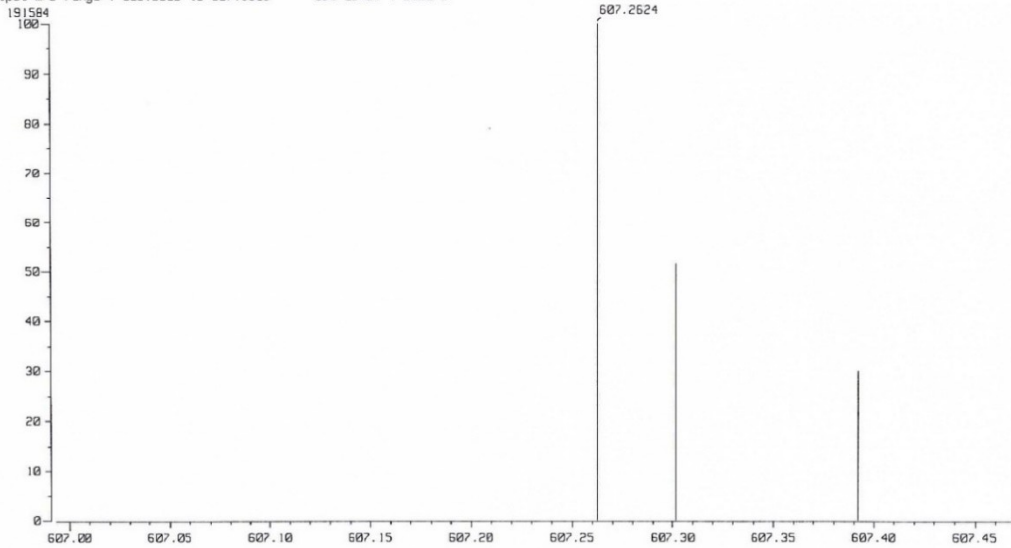

[ Elemental Composition ] Page: 1  
 Data : HFAB-POS-140211008 Date : 11-Feb-2014 18:03  
 Sample: 4  
 Note : with NBA + Na  
 Inlet : Direct Ion Mode : FAB+  
 RT : 2.09 min Scan#: 26  
 Elements : C 30/0, H 50/0, O 3/0, Na 1/0, I 1/0  
 Mass Tolerance : 10mmu  
 Unsaturation (U.S.) : -1.0 - 100.0

| Observed m/z  | Int%        | U.S. | C  | H  | O | Na | I |
|---------------|-------------|------|----|----|---|----|---|
| 607.2624      | 100.0       |      |    |    |   |    |   |
| Estimated m/z | Error [ppm] | U.S. | C  | H  | O | Na | I |
| 607.2624      | +0.0        | 5.5  | 30 | 49 | 3 | 1  | 1 |

[ Theoretical Ion Distribution ] Page: 1  
 Molecular Formula : C30 H49 O3 Na I  
 (m/z 607.2624, MW 607.6115, U.S. 5.5)  
 Base Peak : 607.2624, Averaged MW : 607.6141(a), 607.6147(w)

| m/z      | INT.           |
|----------|----------------|
| 607.2624 | 100.0000 ***** |
| 608.2658 | 34.2164 *****  |
| 609.2690 | 6.2696 ****    |
| 610.2720 | 0.8111         |
| 611.2750 | 0.0821         |
| 612.2779 | 0.0068         |
| 613.2807 | 0.0005         |

Figure S7 HRMS FAB spectrum of 3.

[ Mass Spectrum ]  
 Date : HFAB-POS-140211009 Date : 11-Feb-2014 18:14  
 Sample: 5  
 Note : with NBR + Na Ion Mode : FAB+  
 Inlet : Direct  
 Spectrum Type : Normal Ion (MF-Linear)  
 RT : 2.17 min Scan# : 27  
 BP : m/z 789.3469 Int. : 8.56  
 Output m/z range : 789.1355 to 789.5652 Cut Level : 0.00 %

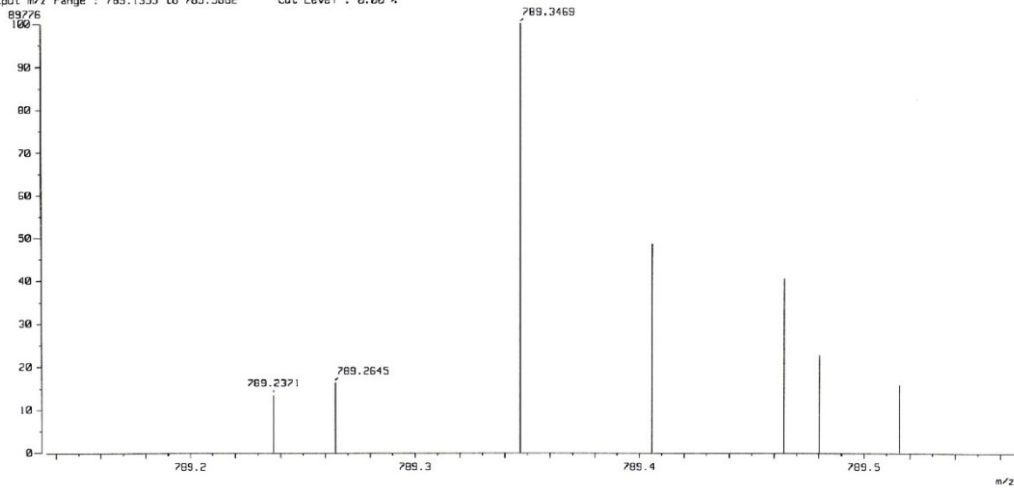

[ Elemental Composition ]  
 Date : 11-Feb-2014 18:14 Page: 1  
 Data : HFAB-POS-140211009  
 Sample: 5  
 Note : with NBA + Na Ion Mode : FAB+  
 Inlet : Direct Scan#: 27  
 RT : 2.17 min  
 Elements : C 42/0, H 59/0, O 3/0, N 2/0, Na 1/0, I 1/0  
 Mass Tolerance : 10mmu  
 Unsaturation (U.S.) : -1.0 - 100.0

| Observed m/z  | Int%        | U.S. | C  | H  | O | N | Na | I |
|---------------|-------------|------|----|----|---|---|----|---|
| 789.3469      | 100.0       |      |    |    |   |   |    |   |
| Estimated m/z | Error [ppm] |      |    |    |   |   |    |   |
| 789.3468      | +0.1        | 13.5 | 42 | 59 | 3 | 2 | 1  | 1 |

[ Theoretical Ion Distribution ]  
 Molecular Formula : C42 H59 I N2 O3 Na Page: 1  
 (m/z 789.3468, MW 789.8363, U.S. 13.5)  
 Base Peak : 789.3468, Averaged MW : 789.8397(a), 789.8404(w)

| m/z      | INT.           |
|----------|----------------|
| 789.3468 | 100.0000 ***** |
| 790.3501 | 48.4479 *****  |
| 791.3533 | 12.0762 *****  |
| 792.3564 | 2.0618 *       |
| 793.3594 | 0.2703         |
| 794.3624 | 0.0289         |
| 795.3653 | 0.0026         |
| 796.3683 | 0.0002         |

Figure S8 HRMS FAB spectrum of 4.



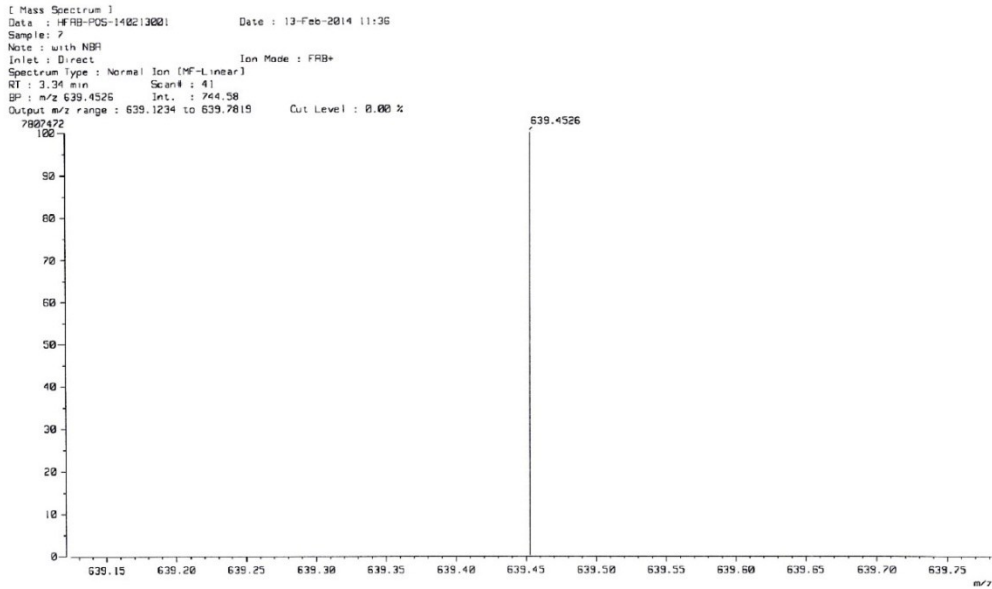

[ Elemental Composition ]  
 Date : HPAB-POS-140213001 Date : 13-Feb-2014 11:36 Page: 1  
 Sample: 7  
 Note : with NBA  
 Inlet : Direct Ion Mode : FAB+  
 RT : 3.34 min Scan# : 41  
 Elements : C 42/0, H 59/0, O 3/0, N 2/0  
 Mass Tolerance : 10mmu  
 Unsaturation (U.S.) : -1.0 - 100.0

| Observed m/z  | Int%        | U.S. | C  | H  | O | N |
|---------------|-------------|------|----|----|---|---|
| 639.4526      | 100.0       | 14.5 | 42 | 59 | 3 | 2 |
| Estimated m/z | Error [ppm] |      |    |    |   |   |
| 639.4526      | +0.0        |      |    |    |   |   |

[ Theoretical Ion Distribution ]  
 Molecular Formula : C42 H59 O3 N2 Page: 1  
 (m/z 639.4526, MW 639.9421, U.S. 14.5)  
 Base Peak : 639.4526, Averaged MW : 639.9455 (a), 639.9463 (w)

| m/z      | INT.           |
|----------|----------------|
| 639.4526 | 100.0000 ***** |
| 640.4559 | 48.4479 *****  |
| 641.4591 | 12.0762 *****  |
| 642.4622 | 2.0618 *       |
| 643.4652 | 0.2703         |
| 644.4682 | 0.0289         |
| 645.4711 | 0.0026         |
| 646.4740 | 0.0002         |

Figure S9 HRMS FAB spectrum of 1.

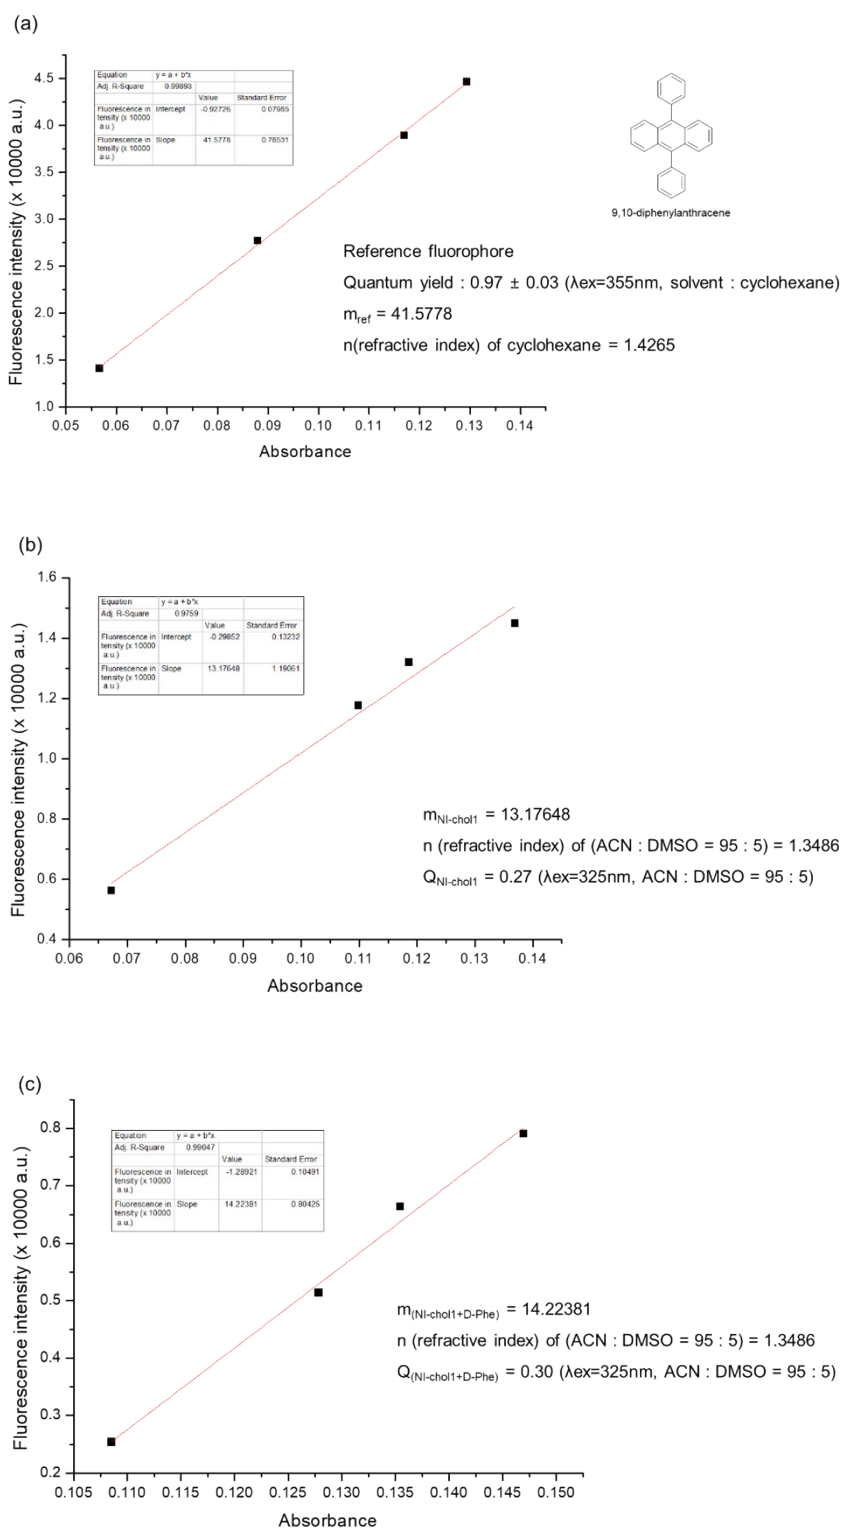

**Figure S10** Absorbance vs. area of fluorescence of (a) 9,10-diphenylanthracene standard, (b) NI-cho1 only and (c) NI-cho1 with Boc-D-Phe.

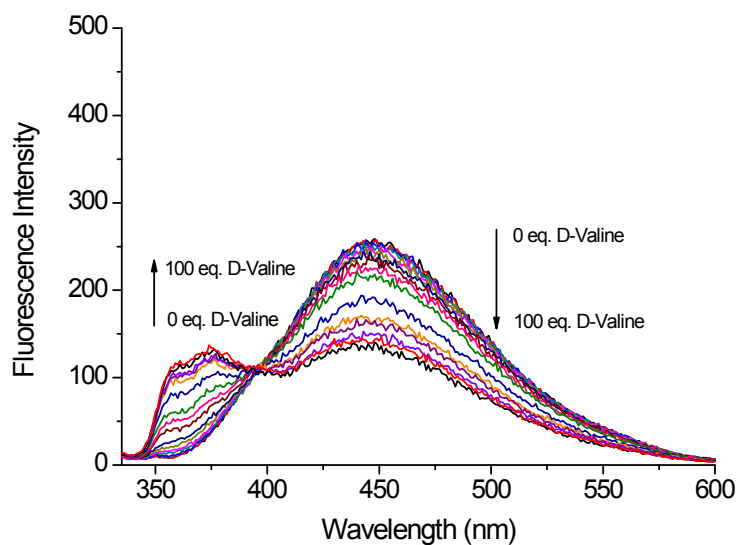

**Figure S11** Fluorescent titrations of **NI-cho1** (10 μM, ACN: DMSO=95 : 5) with various equivalents of D-Val (slit 3×5).

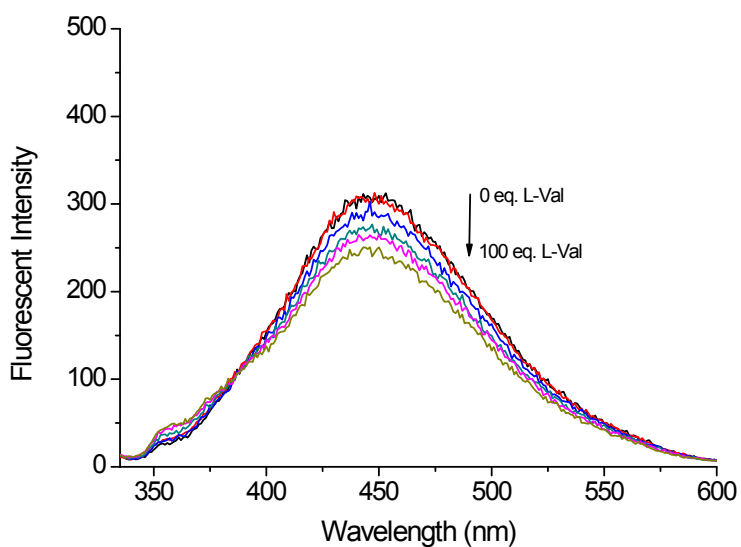

**Figure S12** Fluorescent titrations of **NI-cho1** (10 μM, ACN: DMSO=95 : 5) with various equivalents of L-Val (slit 3×5).

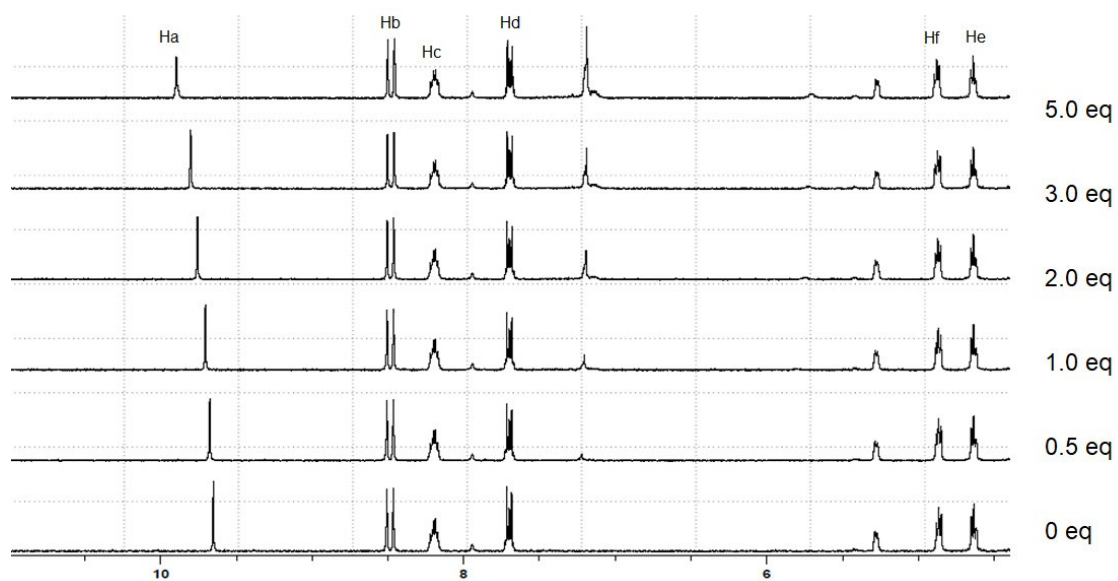

**Figure S13** Partial <sup>1</sup>H NMR spectra (300 MHz) of **NI-cho1 1** (5 mM) upon the addition of Boc-L-Phe (tetrabutylammonium salt) in CD<sub>3</sub>CN-DMSO-*d*<sub>6</sub> (95:5, v/v).

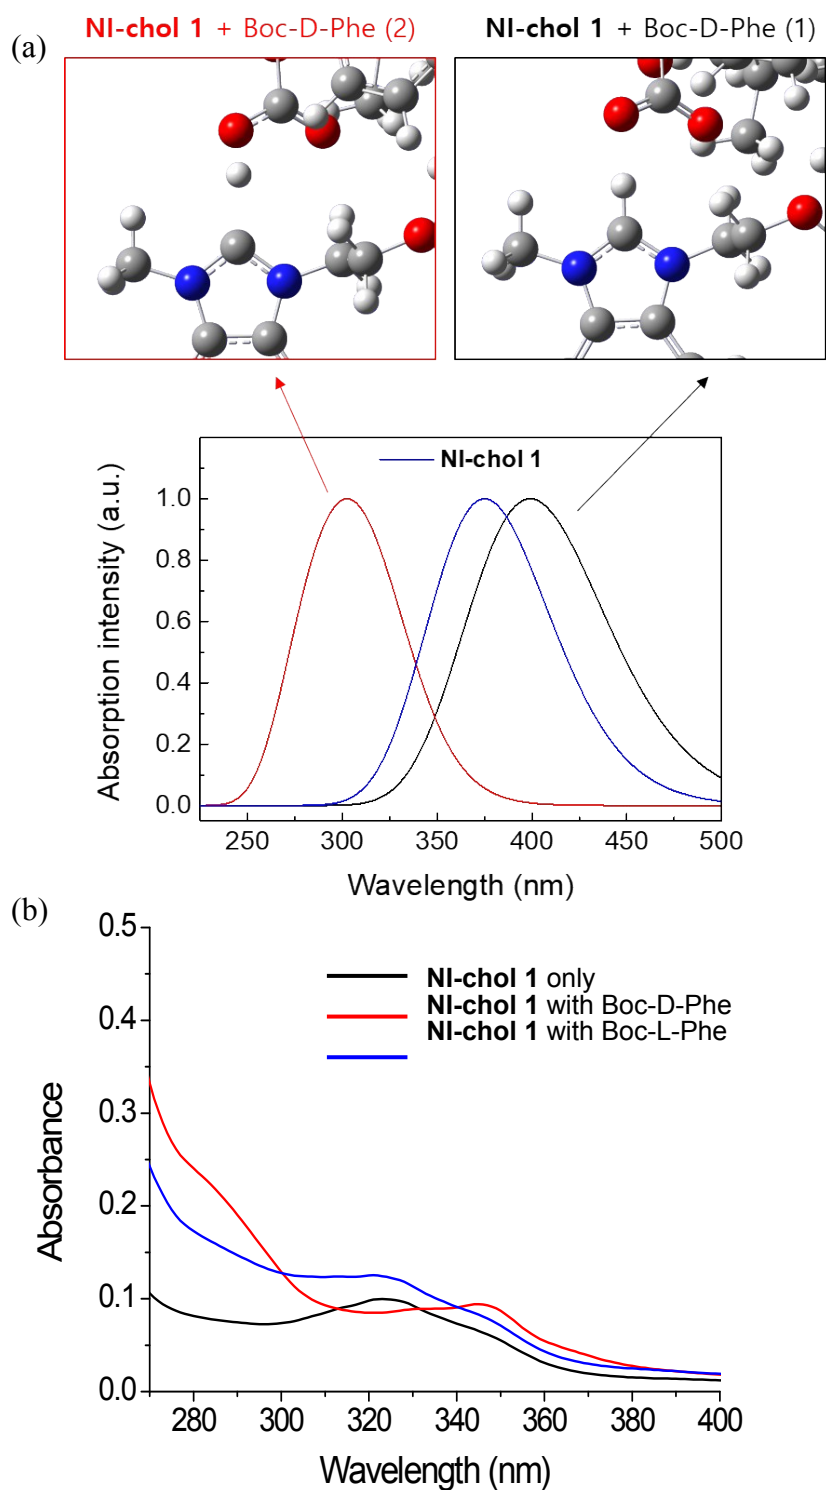

**Figure S14** (a) The calculated absorption spectra of **NI-*chol* 1** and **NI-*chol* 1** with Boc-D-Phe. (b) UV/Vis spectra of **NI-*chol* 1** (10  $\mu$ M) in  $\text{CH}_3\text{CN}$ -DMSO (95:5, v/v) with Boc-D-Phe and Boc-L-Phe (50 eq.).

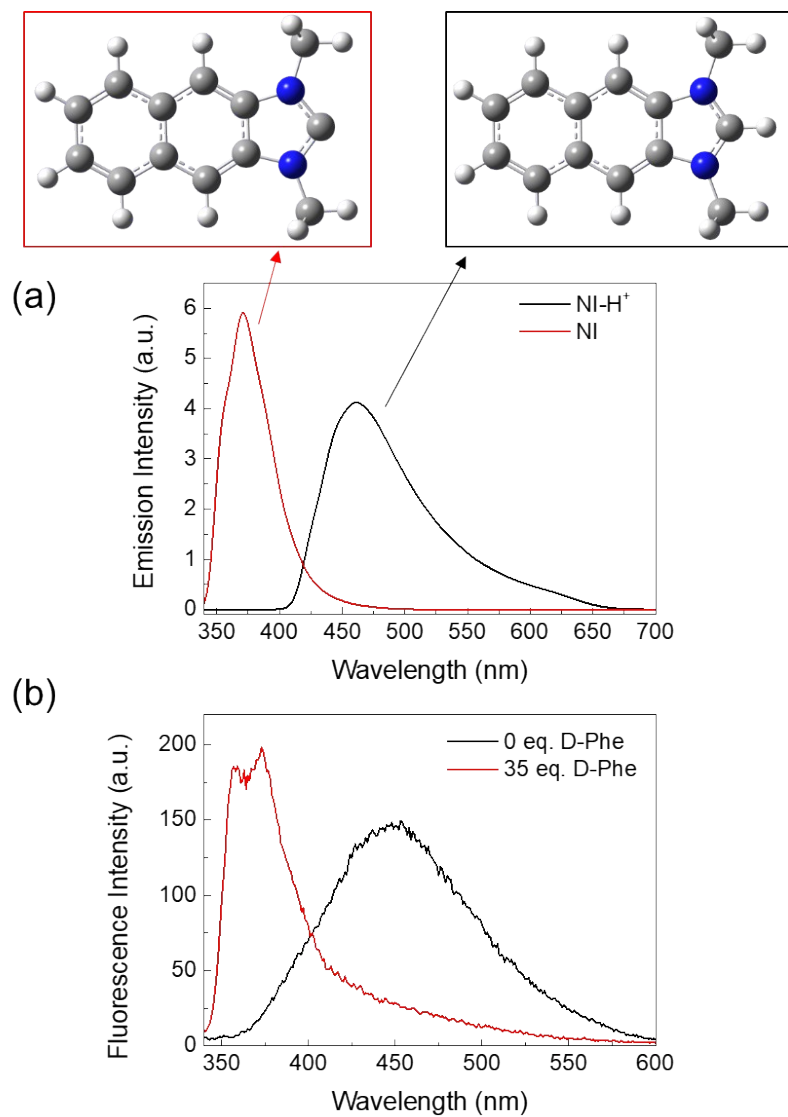

**Figure S15** (a) The calculated (vibronic) emission spectra of protonated and deprotonated **NI**. (b) Fluorescence spectra of **NI-cho1 1** (10  $\mu$ M) with and without Boc-D-Phe in CH<sub>3</sub>CN-DMSO (95:5, v/v).
